# Supplementary material
Source: publisher figshare collection journal article supplement (https://diabetesjournals.figshare.com/ndownloader/files/28660713)
Supplement: Supplementary file 1 [file 28660713]

## Online-Only Supplemental Material

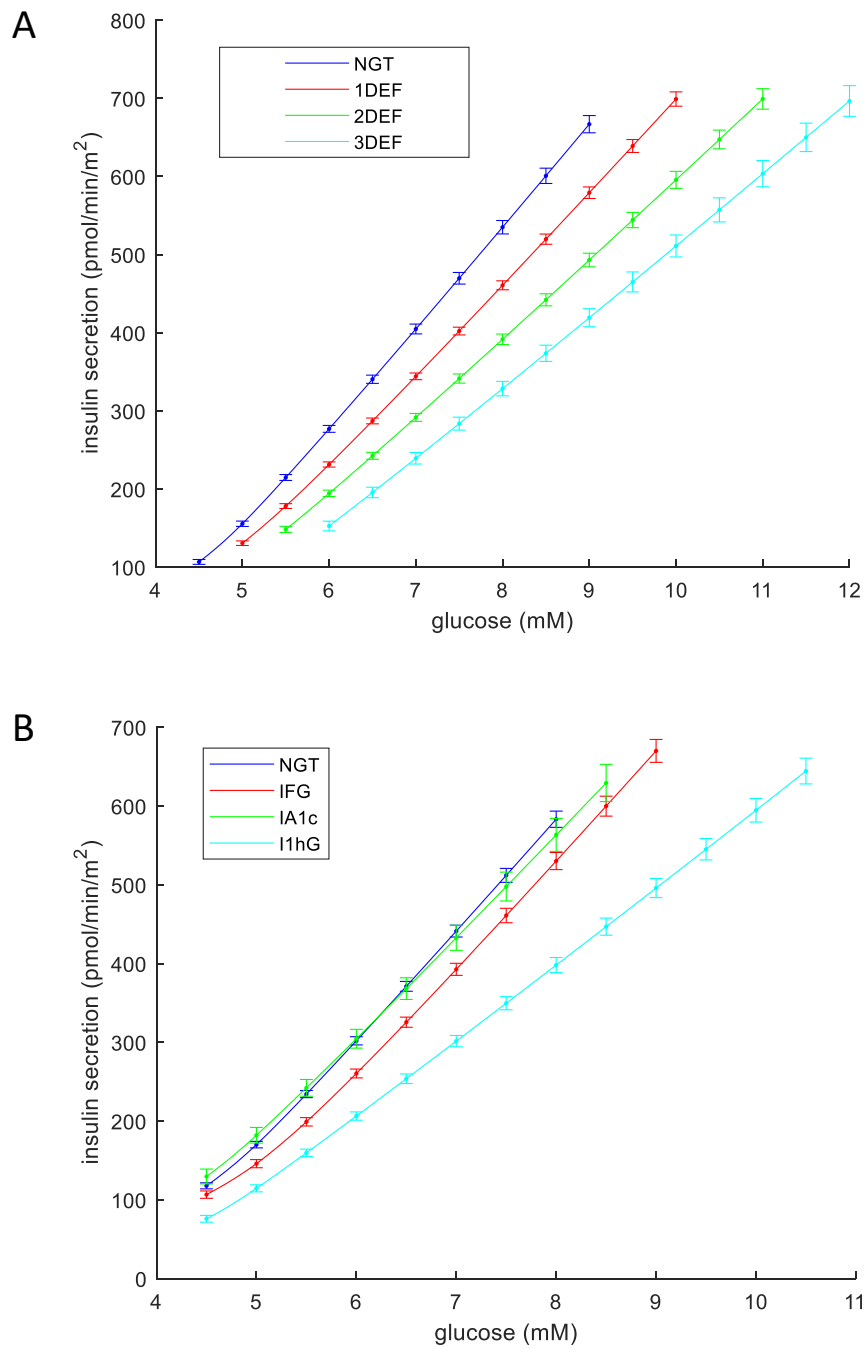

Figure S1 - Model-determined relationship between insulin secretion and glucose concentration in NGT, 1DEF, 2DEF and 3DEF (panel A), and in NGT, IFG, IA1c and I1hG (IGT excluded for low sample size), in the analysis with added 1h glycemia criterion (panel B) (mean $\pm$ standard error). The average slope of the curves is the beta-cell glucose sensitivity,  $G_{SENS}$ .

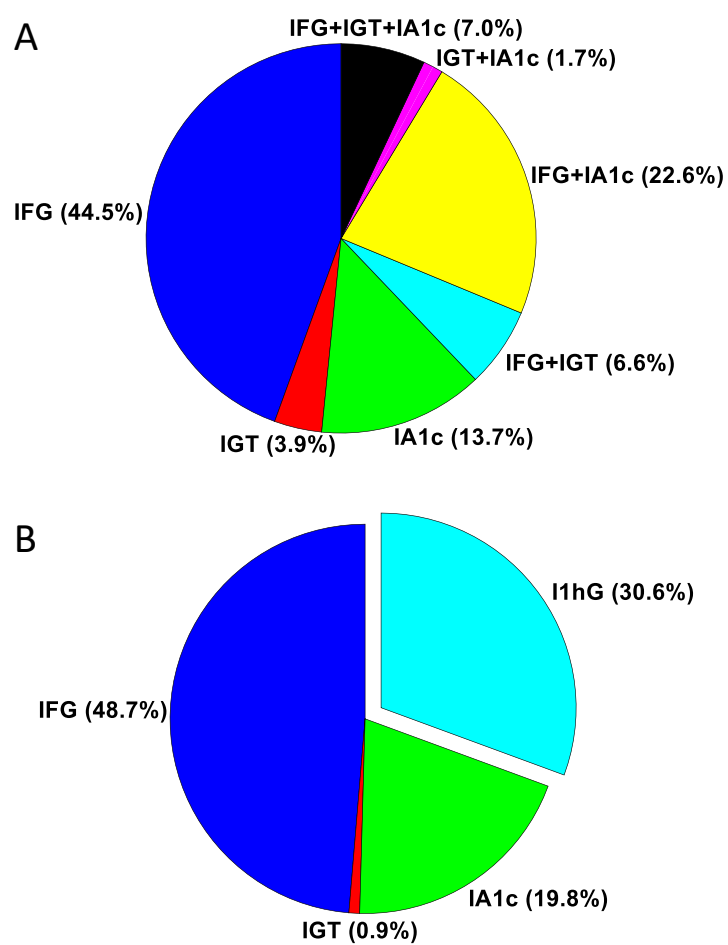

Figure S2 - Percentage of participants in the different prediabetes groups. Percentages in the groups pooling a single or a double defect were 62.1% and 30.9%, respectively (panel A); percentage of participants with a single defect, including 1h glycemia criterion (panel B).
